# Supplementary material for: The Italian record of the Cretaceous shark, Ptychodus latissimus Agassiz, 1835 (Chondrichthyes; Elasmobranchii)
Source: PeerJ. 2020 Nov 24;8:e10167. doi: 10.7717/peerj.10167 (PMC7694571; doi:10.7717/peerj.10167)
Supplement: Supplemental Information 1 — Some of these belong to different historical collections (C, ‘Catullo collection’; D, ‘Dixon collection’; M, ‘Mantell collection’; Z, ‘De Zigno Collection’). [file peerj-08-10167-s001.xlsx]

## Sheet: Foglio1
Catalogue Number	Description	Previous Determination	Provenance
MCV 779	Isolated tooth	Ptychodus latissimus	Possibly from Novale (Vicenza)
MCR FO 00662	Six teeth associated to each other	Ptychodus latissimus	Mazzurega (Verona)
MCR FO 00663	Isolated tooth	Ptychodus latissimus	Surroundings of Levico, Vezzena? (Trento)
MCSNV v.1612	Several teeth associated in a single slab	Ptychodus cf. latissimus	Prun di Valpolicella (Verona)
MCSNV v.12510	Isolated tooth	Ptychodus latissimus	Negrar (Verona)
MCSNV v.12511	Five tooth fragments	Ptychodus latissimus	Unknown
MCSNV v.12513	Two detached teeth	Ptychodus latissimus	Unknown
MCSNV v.12515	Three badly preserved teeth	Ptychodus latissimus	Prun di Valpolicella (Verona)
MCSNV v.12516	Two detached teeth, one of which broke in half	Ptychodus latissimus	Mazzurega (Verona)
MCSNV v.12517	Isolated tooth	Ptychodus latissimus	Verona province, unknown locality
MGC VR 47890	Isolated tooth with matrix	undetermined	Surroundings of S. Anna
MGP-PD 3803	Fragmented tooth with matrix	Ptychodus latissimus	Unknown
MGP-PD 3804	Fragmented tooth with matrix	Ptychodus latissimus	Castellavazzo (Belluno)
MGP-PD 6729-Z	Markedly worn tooth with matrix	Ptychodus paucisulcatus	Prun di Valpolicella (Verona)
MGP-PD 6741-Z	Badly preserved tooth	Ptychodus latissimus / P. paucisulcatus	Prun di Valpolicella (Verona)
MGP-PD 6742-Z	Four fragments with matrix	Ptychodus latissimus / P. paucisulcatus	Prun di Valpolicella (Verona)
MGP-PD 7347-C	Tooth with matrix	Ptychodus latissimus	Possibly Castellavazzo (Belluno)
MGP-PD 8491-C	Badly preserved tooth	Ptychodus latissimus	Castellavazzo (Belluno)
MGP-PD 8495-C	Isolated tooth	Ptychodus latissimus	Breonio (Verona)
MGP-PD 12201	Tooth with matrix	Ptychodus latissimus	Valdagno (Vicenza)
MGP-PD 12202	Tooth with matrix	Ptychodus latissimus	Valdagno (Vicenza)
MGP-PD 12203	Tooth with matrix	Ptychodus latissimus	Valdagno (Vicenza)
MGP-PD 14028	Tooth with matrix	Ptychodus latissimus	“Forni di Zoldo” = Castellavazzo
MGP-PD 14030	Tooth with matrix	Ptychodus latissimus	“Forni di Zoldo” = Castellavazzo
MGP-PD 23538	Four fragmented teeth with matrix	Ptychodus latissimus	Castellavazzo (Belluno)
MGP-PD 23540	Badly preserved tooth with matrix	Ptychodus latissimus	Castellavazzo (Belluno)
MGP-PD 27249	Tooth with matrix	Ptychodus sp.	Surroundings of Belluno
MSNPS 272	Isolated tooth	Ptychodus mediterraneus	Unknown
NHMW 8543	Three isolated teeth	Ptychodus latissimus	Surroundings of Belluno
