# Supplementary material for: The Italian record of the Cretaceous shark, Ptychodus latissimus Agassiz, 1835 (Chondrichthyes; Elasmobranchii)
Source: PeerJ. 2020 Nov 24;8:e10167. doi: 10.7717/peerj.10167 (PMC7694571; doi:10.7717/peerj.10167)
Supplement: Supplemental Information 2 — CW, Crown width; CL, Crown length; CH, Crown height; nTR, number of transverse ridges; WT, worn tooth. Estimated values are indicated in parentheses. [file peerj-08-10167-s002.xlsx]

## Sheet: Foglio1
Catalogue Number	CW	CL	CH	nTR	WT
MCSNV v.1612a	~ (36) mm	~ 33 mm	~ 21 mm	6
MCSNV v.1612b	~ (22) mm	~ (23) mm	-	5
MCSNV v.1612c	~ (21) mm	~ (19) mm	-	5
MCSNV v.1612d	-	~ (23) mm	-	5
MCSNV v.1612e	~ (48) mm	~ (42) mm	-	-7	✓
MCSNV v.1612f	~ (65) mm	~ (53) mm	-	-7
MCSNV v.1612g	~ 24 mm	~ 17 mm	-	4
MCSNV v.1612h	~ 19 mm	~ 12 mm	-	4
MCSNV v.1612i	~ (19) mm	~ (13) mm	-	5
MCSNV v.1612j	~ (17) mm	-	-	-4
MCSNV v.1612k	~ 25 mm	~ (20) mm	-	4
MCSNV v.1612l	~ 20 mm	~ 15 mm	-	5
MCSNV v.1612m	~ (18) mm	~ (17) mm	-	5
MCSNV v.1612n	~ 63 mm	~ 49 mm	-	-
MCSNV v.1612o	~ 18 mm	~ 13 mm	-	4
MCSNV v.1612p	~ (24) mm	~ (20) mm	-	5
MCSNV v.1612q	~ (27) mm	~ (23) mm	-	5
MCSNV v.1612r	~ (33) mm	~ (28) mm	~ (15) mm	5
MCSNV v.1612s	~ 39 mm	~ 36 mm	-	6
MCSNV v.1612t	~ 61 mm	~ 51 mm	~ (30) mm	7
MCSNV v.1612u	~ 66 mm	~ 55 mm	~ (34) mm	7
MCSNV v.1612v	~ 58 mm	~ 44 mm	~ (24) mm	7
MCSNV v.1612w	~ (36) mm	~ 32 mm	-	5
